# Supplementary material
Source: PubMed Central journal article supplement (PMC3400701)
Supplement: NIHMS383239-supplement-1_si_001.pdf [file NIHMS383239-supplement-1_si_001.pdf]

**Supporting Information for:**

***In Vivo* Clearance and Toxicity of Monodisperse Iron Oxide Nanocrystals**

Luo Gu, Ronnie H. Fang, Michael J. Sailor, and Ji-Ho Park

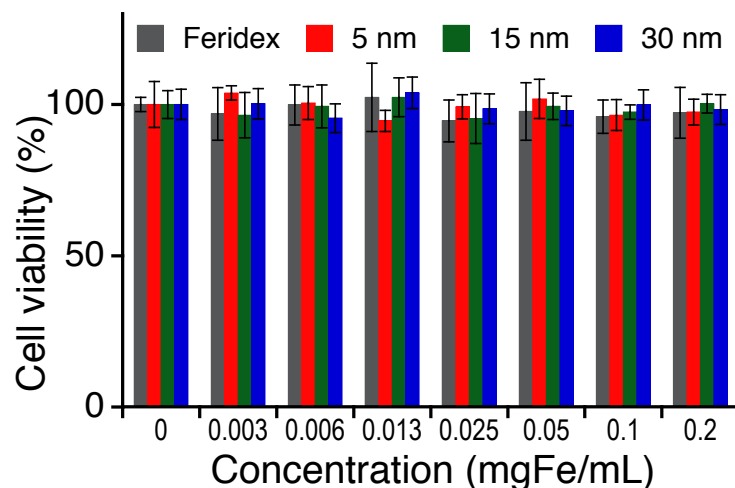

**Figure S1.** *In vitro* toxicity of iron oxide (IO) nanoparticles. HeLa cells were incubated with IO nanoparticles for 48 h and their viability was evaluated using MTT assay. Statistical analyses were performed with Student's t test ( $*p < 0.05$  for the difference between monodisperse IO nanoparticles and Feridex® nanoparticles, two-tailed, unpaired,  $n = 4$ , error bars = standard deviation). There was no significant difference between monodisperse IO nanoparticles and Feridex® nanoparticles at each concentration of the nanoparticles.

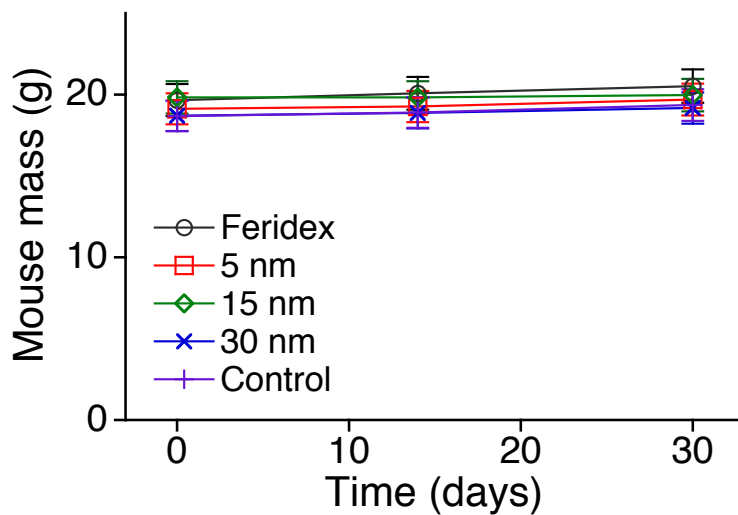

**Figure S2.** Body mass of mice injected with PEG—phospholipid coated IO nanocrystals prepared via the organometallic route (sizes of ~5 nm, ~15 nm and ~30 nm) and commercially obtained Feridex® compared with PBS control, as indicated, as a function of days post-injection (5 mgFe/kg). There is no statistically significant difference in the mass change between control (PBS) and IO nanoparticle injected mice. Statistical analyses were performed with Student’s t test ( $*p < 0.05$  for the difference between IO nanoparticles and PBS, two-tailed, unpaired,  $n = 4\sim 6$ , error bars = standard deviation). There was no significant difference between IO nanoparticles and PBS at each time point.

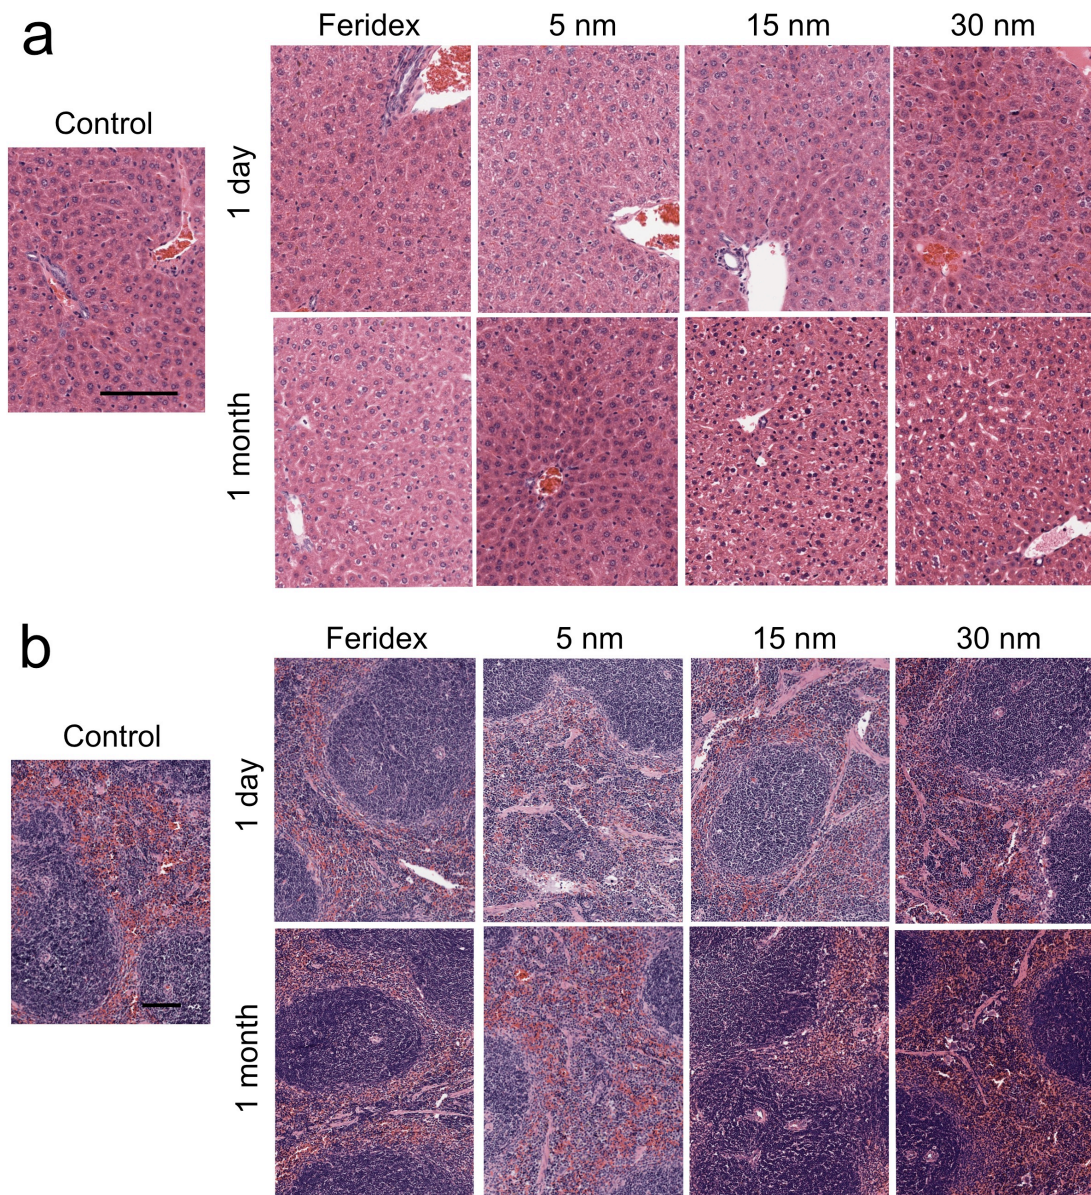

**Figure S3.** Liver (a) and spleen (b) histology. Livers and spleens were harvested from mice before, 1 day, and 1 month after intravenous injection of 5 mgFe/kg PEG—phospholipid coated IO nanoparticles prepared via the organometallic route (sizes of ~5 nm, ~15 nm and ~30 nm) or Feridex® iron oxide nanoparticles, as indicated. Organs were stained with hematoxylin and eosin. Liver histology samples obtained one day post-injection showed some swollen and dark Kupffer cells, presumably due to uptake of the nanoparticles. The scale bar is 100  $\mu\text{m}$  for all images.
